1        **The PAS domain-containing protein HeuR regulates heme uptake in**  
2                                            ***Campylobacter jejuni***

3

4                Jeremiah G. Johnson<sup>1§\*</sup>, Jennifer A. Gaddy<sup>2</sup>, and Victor J. DiRita<sup>1</sup>

5

6        <sup>1</sup> Department of Microbiology and Molecular Genetics, Michigan State University,  
7        East Lansing, MI 48824

8        <sup>2</sup> Department of Medicine, Vanderbilt University, Nashville, TN 37232

9        <sup>§</sup>Current address: Department of Microbiology, University of Tennessee,  
10        Knoxville, TN 37996

11

12        \*Corresponding author:

13        M409 Walters Life Sciences Building

14        Department of Microbiology

15        University of Tennessee – Knoxville

16        Knoxville, TN 37996

17        (865) 974-3441

18        [jjohn358@utk.edu](mailto:jjohn358@utk.edu)

19

20        Short title: Regulation of heme uptake in *Campylobacter jejuni*

21 **Abstract**

22

23 *Campylobacter jejuni* is a leading cause of bacterial-derived  
24 gastroenteritis. A previous mutant screen demonstrated that the heme uptake  
25 system (Chu) is required for full colonization of the chicken gastrointestinal tract.  
26 Subsequent work found identified a PAS domain-containing regulator, termed  
27 HeuR, as required for chicken colonization. Here we confirm that both the heme  
28 uptake system and HeuR are required for full chicken gastrointestinal tract  
29 colonization, with the *heuR* mutant being particularly affected during competition  
30 with wild-type *C. jejuni*. Transcriptomic analysis identified the *chu* genes – and  
31 those encoding other iron uptake systems – as likely regulatory targets of HeuR.  
32 Purified HeuR specifically bound the *chuZA* promoter region in electrophoretic  
33 mobility shift assays. Consistent with a role for HeuR in *chu* expression, *heuR*  
34 mutants were unable to efficiently use heme as a source of iron in iron-limiting  
35 conditions and, mutants exhibited decreased levels of cell-associated iron by  
36 mass spectrometry. Finally, we demonstrate that a *heuR* mutant of *C. jejuni* is  
37 resistant to hydrogen peroxide, and that this resistance correlates to elevated  
38 levels of catalase activity.

39

40 **Author Summary**

41

42 *Campylobacter jejuni* causes millions of gastrointestinal infection every  
43 year. This is primarily due to the its ability to reside in the gastrointestinal tract of

44 chickens. *C. jejuni* contaminates chicken meat during harvesting and  
45 processing. Following consumption of undercooked chicken or uncooked food  
46 that was contaminated with raw chicken juice, humans develop a debilitating  
47 illness that is characterized by diarrhea and abdominal cramps. As chickens are  
48 the source of most human infections, there is a need to understand how *C. jejuni*  
49 colonizes chickens so we can develop ways to reduce its presence in chickens  
50 and thereby improve food safety. Most organisms require iron to thrive and that  
51 some bacteria steal iron from host molecules, including hemoglobin. Here we  
52 demonstrate that *C. jejuni* may need to get iron from hemoglobin in order to  
53 colonize the chicken and that a regulatory protein, HeuR, controls the ability of  
54 the bacteria to do this. If we can understand how this protein works, we may be  
55 able to develop ways to inhibit its function and reduce the ability of *C. jejuni* to get  
56 iron during chicken colonization. This would limit the amount of *C. jejuni* in the  
57 chicken and make food safer.

58

## 59 **Introduction**

60

61 *Campylobacter jejuni* is a leading cause of gastrointestinal infection  
62 worldwide, with a projected 1.3 million annual cases in the United States (1).  
63 The prevalence of *C. jejuni* infection is due to its ability to reside  
64 asymptotically within the gastrointestinal tract of avians, especially chickens.  
65 During processing of poultry, *C. jejuni* is released from the gastrointestinal tract,  
66 contaminating meat products as a result. Patients with *C. jejuni* infection typically

67 develop mild to severe, bloody diarrhea that may be accompanied by fever.  
68 Additionally, several post-infectious disorders have been associated with *C. jejuni*  
69 infection, including Guillain-Barre Syndrome, post-infectious irritable bowel  
70 syndrome, and reactive arthritis (2, 3). Further highlighting these concerns is  
71 increasing resistance of *C. jejuni* to the clinically-relevant antibiotics, azithromycin  
72 and ciprofloxacin, prompting the Center for Disease Control and Prevention to list  
73 antibiotic-resistant *C. jejuni* as a “Serious Threat” to public health (1).

74         Due to the importance of chickens in human *C. jejuni* infection, much  
75 emphasis has been placed on identifying and characterizing factors that are  
76 required for colonization of the chicken gastrointestinal tract. Previously, our  
77 group has used both signature-tagged mutagenesis (STM) and insertion  
78 sequencing (TnSeq) approaches to identify colonization determinants of *C. jejuni*  
79 (4, 5). The earlier STM approach identified genes involved in chemotaxis and  
80 flagellar biogenesis, but several other colonization factors were identified using  
81 the TnSeq approach. One determinant identified to be reduced by 250-fold in  
82 cecal outputs by TnSeq was a component of the heme utilization gene cluster,  
83 *chuB* (Cjj81176\_1602), indicating that acquiring iron from heme may be  
84 important during colonization of the chicken gastrointestinal tract (4).

85         Due to the prominent redox potential of  $Fe^{2+}/Fe^{3+}$ , most organisms require  
86 iron as a redox cofactor for enzyme complexes. Since the host often restricts  
87 iron availability to limit microbial growth – a process termed nutritional immunity -  
88 many bacterial species have developed methods for obtaining iron from host  
89 molecules, including heme (6). The heme utilization gene cluster of *C. jejuni*

90 consists of genes encoding a predicted TonB-dependent heme receptor (*chuA*),  
91 a heme ABC transporter permease (*chuB*), a heme ABC transporter ATP-  
92 binding protein (*chuC*), and a periplasmic heme-binding protein (*chuD*) (7).  
93 Divergently transcribed from the transport genes is a previously characterized  
94 heme oxygenase, *chuZ*, which directly binds heme and degrades it in the  
95 presence of an electron donor (7, 8). All components of the heme utilization  
96 gene cluster are required for efficient use of heme as a sole iron source and the  
97 ferric uptake repressor (Fur) protein directly binds to the promoter region of the  
98 gene cluster, implicating Fur as a *chu* locus regulator (7).

99       These data are consistent with observations that, in most organisms,  
100 intracellular iron levels are tightly regulated to avoid forming toxic hydroxyl  
101 radicals and superoxide anions via Haber-Weiss-Fenton catalysis (9). *C. jejuni* is  
102 exceptional in that it is also exquisitely sensitive to oxidative stress and, as a  
103 result, adequate intracellular iron levels must be maintained as a redox cofactor.  
104 While the above studies indicated that increased iron levels repress *chu* gene  
105 expression, likely via Fur binding, no positive regulators of heme and/or iron  
106 uptake have been identified. Due to the importance of iron in combating  
107 oxidative stress in *C. jejuni*, it would be surprising if *Campylobacter* did not have  
108 some mechanism for increasing iron uptake under unfavorable redox states. As  
109 such, we hypothesized that *C. jejuni* likely maintains intracellular iron levels using  
110 both negative regulation, as seen in previous work with Fur, and positive  
111 regulation.

112 In subsequent TnSeq experiments that aimed at finding additional chicken  
113 colonization determinants, a candidate regulator was identified, Cjj81176\_1389  
114 (unpublished data). This regulator is predicted to contain an N-terminal Per-Arnt-  
115 Sim (PAS) domain and a C-terminal helix-turn-helix DNA binding domain. The  
116 PAS domain is a ligand-binding domain that interacts with a chemically diverse  
117 array of small molecules (10). These domains, while highly divergent in primary  
118 sequence identity, maintain a conserved three-dimensional architecture (10).  
119 When ligand binds to a PAS domain, the protein either directly initiates a  
120 signaling response or the protein-ligand complex becomes capable of responding  
121 to a secondary cue, including gas molecules, photons, or redox potential (10).  
122 We reasoned that since the heme utilization gene cluster and Cjj81176\_1389  
123 appear to be required for full colonization of the chicken gastrointestinal, and that  
124 Cjj81176\_1389 may be sensing intracellular redox potential, Cjj81176\_1389  
125 could be directly regulating *chu* gene expression.

126 Here we demonstrate that Cjj81176\_1389 mutants are significantly  
127 reduced for chicken gastrointestinal tract colonization, particularly during  
128 competition with wild-type *C. jejuni*. Subsequent transcriptomic analysis found  
129 that this regulator, hereafter referred to as HeuR (for **h**eme **u**ptake **r**egulator),  
130 positively influences *chu* gene expression, as well as other iron uptake systems.  
131 Purified HeuR specifically binds the *chuZA* promoter region, indicating it may  
132 regulate *chu* gene expression directly. Further, *heuR* mutants are unable to  
133 efficiently use heme as a sole iron source and exhibit decreased levels of cell-

134 associated iron. Finally, we show that loss of *heuR* leads to hydrogen peroxide  
135 resistance, in turn due to elevated levels of catalase activity.

136

## 137 **Results**

138

### 139 ***C. jejuni* lacking *heuR* are unable to efficiently colonize the chicken**

140 **gastrointestinal tract.** Colonization studies using defined insertion-deletion

141 mutants were performed using day-of-hatch chicks. Animals were inoculated

142 with:  $2.5 \times 10^8$  cfu wild-type *C. jejuni*,  $1.7 \times 10^8$  cfu *heuR* mutant, or  $1.9 \times 10^8$  *chuA*

143 mutant. Following 7 days of colonization, viable bacteria present within cecal

144 samples were enumerated and the medians found to be:  $5.8 \times 10^9$  cfu/g for wild-

145 type *C. jejuni*,  $6.6 \times 10^8$  cfu/g for *heuR*, and  $5.6 \times 10^7$  cfu/g for the *chuA* mutant.

146 The chicks that were mock infected with PBS did not yield detectable *C. jejuni*.

147 Statistical analysis of the medians revealed that both *heuR* mutants were

148 significantly decreased for colonization, but the *chuA* mutant was not ( $p = 0.1$ ).

149 Competition analysis using the *heuR* mutant indicated a severe

150 competitive defect of the mutant versus wild-type *C. jejuni*. The *heuR* mutant

151 yielded a mean competitive index value of  $0.004 \pm 0.007$ , representing a 250-fold

152 decrease in colonization potential compared to wild-type *C. jejuni* (Figure 1B).

153 Statistical analysis of this competitive disadvantage was found to be significant.

154

### 155 **Figure 1. Colonization of day-of-hatch chicks with *heuR* mutants. (A)**

156 Mono-colonization of day-of-hatch white leghorn chicks with either wild-type *C.*

157 *jejuni*, the *heuR* mutant, or the *chuA* mutant. Cecal loads were determined using  
158 selective media following a 7-day colonization. The median values are noted  
159 and results compared using the Mann-Whitney U-test. (B) Competition analysis  
160 of wild-type *C. jejuni* versus the *heuR* mutant. Following correction for inocula,  
161 the ratio of *heuR*/wild-type was determined and presented as a competitive  
162 index. Statistical analysis was performed using a one-sample t-test against a  
163 hypothetical value of 1.

164

165 **Genes involved in inorganic ion transport are underexpressed in the *heuR***  
166 **mutant.** To determine the extent of the HeuR regulon, we employed  
167 transcriptomic analysis of wild-type *C. jejuni* and *heuR* mutant cultures. RNAseq  
168 analysis of the *heuR* mutant identified 43 genes whose transcripts were  
169 decreased in abundance by at least two-fold compared to wild-type *C. jejuni*  
170 (Table 1). These values represented statistically significant decreases for all  
171 genes identified. The Microbial Genomic context Viewer (MGcV) identified the  
172 NCBI GI numbers for 31/43 loci and, using a cluster of orthologous group (COG)  
173 analysis, assigned a functional class to 19/31 loci. Of the 19 loci for which a  
174 function could be assigned, eight (42%) were involved in inorganic ion transport  
175 and metabolism, including all five *chu* genes (Figure 2A). Also, amino acid  
176 transport and metabolism were well represented with four loci (21%). The MGcV  
177 analysis did not identify NCBI GI numbers for the enterochelin system, which was  
178 also identified - iron acquisition by this system has been described in  
179 *Campylobacter* and multiple organisms (11, 12).



180 In addition to those genes that were found to exhibit reduced transcription  
 181 in the *heuR* mutant, transcriptomic analysis identified 16 genes with elevated  
 182 transcript abundance in the mutant (Table 2). The majority of this set included  
 183 genes belonging to two gene clusters: Cjj81176\_1390-1394 and Cjj81176\_1214-  
 184 1217. MGcV identified NCBI GI numbers for 11/16 genes and assigned  
 185 functions to 10/11 loci. This group is fairly diverse with the largest representation  
 186 belonging to the amino acid transport and metabolism COG (30%) (Figure 2B).

187

188 **Table 1. Genes with reduced transcript abundance in the *heuR* mutant.**

| Locus          | Predicted Function                         | Fold-change (log <sub>2</sub> ) | P-value <sup>1</sup> |
|----------------|--------------------------------------------|---------------------------------|----------------------|
| CJJ81176_1389  | conserved hypothetical protein             | -5.62                           | 4.5E-108             |
| CJJ81176_1601  | TonB-dependent heme receptor               | -3.34                           | 1.2E-25              |
| CJJ81176_1603  | hemin ABC transporter, ATP-binding         | -3.32                           | 1.0E-36              |
| CJJ81176_1604  | hemin ABC transporter, periplasmic binding | -3.22                           | 9.3E-33              |
| CJJ81176_1602  | hemin ABC transporter, permease protein    | -3.12                           | 2.2E-38              |
| CJJ81176_1704  | 16S ribosomal RNA                          | -2.48                           | 5.1E-03              |
| CJJ81176_1727  | 23S ribosomal RNA                          | -2.47                           | 1.8E-04              |
| CJJ81176_1707  | 23S ribosomal RNA                          | -2.46                           | 2.1E-04              |
| CJJ81176_1714  | 23S ribosomal RNA                          | -2.45                           | 1.9E-04              |
| CJJ81176_1711  | 16S ribosomal RNA                          | -2.45                           | 6.0E-03              |
| CJJ81176_1724  | 16S ribosomal RNA                          | -2.44                           | 5.8E-03              |
| EBG00001201819 | Unknown                                    | -2.42                           | 2.3E-04              |
| EBG00001201824 | Unknown                                    | -2.42                           | 2.7E-04              |
| EBG00001201849 | Unknown                                    | -2.41                           | 6.4E-03              |
| EBG00001201811 | Unknown                                    | -2.41                           | 2.6E-04              |
| EBG00001201820 | Unknown                                    | -2.40                           | 6.3E-03              |
| EBG00001201839 | Unknown                                    | -2.39                           | 8.0E-03              |
| CJJ81176_1386  | conserved hypothetical protein             | -2.39                           | 3.6E-13              |
| CJJ81176_1385  | hypothetical protein                       | -2.33                           | 6.4E-18              |
| CJJ81176_1600  | conserved hypothetical protein             | -1.81                           | 8.5E-12              |
| CJJ81176_1623  | putative periplasmic protein               | -1.42                           | 4.6E-08              |
| CJJ81176_0471  | TonB-dependent receptor, putative          | -1.28                           | 2.4E-06              |
| CJJ81176_1333  | flagellin modification protein, PseA       | -1.28                           | 2.0E-10              |
| CJJ81176_0761  | conserved hypothetical protein             | -1.24                           | 1.8E-07              |
| CJJ81176_0075  | cytochrome c family protein                | -1.22                           | 5.0E-05              |

|               |                                           |       |         |
|---------------|-------------------------------------------|-------|---------|
| CJJ81176_0235 | citrate transporter, authentic frameshift | -1.20 | 1.9E-09 |
| CJJ81176_0241 | hypothetical protein                      | -1.19 | 3.8E-08 |
| CJJ81176_1443 | hypothetical protein                      | -1.18 | 9.4E-06 |
| CJJ81176_0710 | flagellar L-ring protein FlgH             | -1.17 | 8.4E-08 |
| CJJ81176_0760 | haemagglutination domain protein          | -1.16 | 2.1E-04 |
| CJJ81176_0052 | sodium/dicarboxylate symporter            | -1.15 | 1.9E-07 |
| CJJ81176_1353 | enterochelin ABC transporter, ATP-binding | -1.15 | 6.0E-06 |
| CJJ81176_1355 | conserved hypothetical protein            | -1.12 | 6.1E-03 |
| CJJ81176_1354 | enterochelin ABC transporter, periplasmic | -1.11 | 7.4E-08 |
| CJJ81176_0875 | hypothetical protein                      | -1.11 | 7.2E-07 |
| CJJ81176_1622 | hypothetical protein                      | -1.10 | 6.6E-07 |
| CJJ81176_0928 | amino acid ABC transporter, periplasmic   | -1.10 | 5.0E-05 |
| CJJ81176_0772 | conserved hypothetical protein            | -1.10 | 4.6E-11 |
| CJJ81176_0067 | gamma-glutamyltransferase                 | -1.04 | 1.2E-03 |
| CJJ81176_0722 | glutamine synthetase, type I              | -1.04 | 1.5E-05 |
| CJJ81176_1062 | conserved hypothetical protein            | -1.04 | 8.5E-12 |
| CJJ81176_0440 | conserved hypothetical protein            | -1.02 | 7.5E-06 |
| CJJ81176_1332 | imidazole glycerol phosphate synthase     | -1.01 | 2.1E-11 |

189 <sup>†</sup>False Discovery Rate corrected using Benjamini-Hochberg method

190

191 **Table 2. Genes with elevated transcript abundance in the *heuR* mutant.**

| Locus             | Predicted Function                        | Fold-change (log <sub>2</sub> ) | P-value <sup>†</sup> |
|-------------------|-------------------------------------------|---------------------------------|----------------------|
| CJJ81176_1390     | endoribonuclease L-PSP, putative          | 3.49                            | 9.5E-51              |
| CJJ81176_1391     | cryptic C4-dicarboxylate transporter DcuD | 3.32                            | 3.1E-43              |
| CJJ81176_1394     | MmgE/PrpD family protein                  | 3.19                            | 4.3E-42              |
| CJJ81176_1393     | adenylosuccinate lyase                    | 3.17                            | 5.8E-41              |
| CJJ81176_1392     | cystathionine beta-lyase                  | 3.16                            | 5.0E-39              |
| CJJ81176_pVir0034 | hypothetical protein                      | 1.79                            | 2.0E-07              |
| CJJ81176_1217     | 5,10-methylenetetrahydrofolate reductase  | 1.71                            | 3.0E-28              |
| CJJ81176_1216     | methionine synthase MetE                  | 1.71                            | 1.5E-14              |
| CJJ81176_1215     | lipoprotein, NLPA family                  | 1.71                            | 1.4E-12              |
| CJJ81176_1214     | oxidoreductase, 2OG-Fe(II) oxygenase      | 1.52                            | 7.5E-13              |
| CJJ81176_0271     | MCP-domain signal transduction protein    | 1.40                            | 5.8E-03              |
| EBG00001201809    | Unknown                                   | 1.08                            | 1.6E-03              |
| EBG00001201810    | Unknown                                   | 1.05                            | 1.7E-03              |
| EBG00001201838    | Unknown                                   | 1.05                            | 3.2E-05              |
| EBG00001201844    | Unknown                                   | 1.03                            | 1.4E-02              |
| CJJ81176_0257     | conserved hypothetical protein            | 1.01                            | 7.5E-07              |

192 <sup>†</sup>False Discovery Rate corrected using Benjamini-Hochberg method

193

194 **Figure 2. COG analysis of genes differentially expressed in the *heuR***  
195 **mutant.** (A) Identified COGs for genes in Table 1 that were found to be  
196 underexpressed in the *heuR* mutant. (B) COGs identified for genes in Table 2  
197 that were overexpressed in the *heuR* mutant.

198

199 **Purified HeuR binds specifically to the *chuZA* promoter.** The putative  
200 structure of HeuR includes a C-terminal helix-turn-helix DNA binding domain.  
201 Given the transcriptome data demonstrating that *chu* RNA abundance is  
202 dependent on HeuR, we hypothesized that HeuR directly regulates *chu* gene  
203 expression. Purification of 6xHis-tagged HeuR was successful as soluble protein  
204 was obtained at concentrations of 4.3 mg/ml. Incubation of purified 6xHis-HeuR  
205 with radiolabeled *chuZA* promoter and subsequent resolution by native  
206 polyacrylamide gel electrophoresis indicated binding of the protein to the *chuZA*  
207 probe using 30  $\mu$ g of 6xHis-HeuR (Figure 3). The shifted species increased in  
208 intensity until 125  $\mu$ g of HeuR was used and the fragment representing unbound  
209 *chuZA* promoter was not detected. These results were in contrast to those  
210 obtained for a radiolabeled fragment that represented the intergenic region  
211 between *C. jejuni* 81-176 *mapA* and *ctsW*, which are not predicted to be  
212 regulated by HeuR. Mobility of this probe was relatively unaffected until 500  $\mu$ g  
213 of HeuR was used, when unbound probe intensity was modestly decreased.

214

215 **Figure 3. Binding of purified 6xHis-HeuR to the *chuZA* promoter.**

216 Increasing amounts of purified 6xHis-HeuR were added to binding reactions  
217 containing approximately 0.25 nM of the *chuZA* promoter fragment and the  
218 *mapA-ctsW* intergenic region as a non-specific control.

219

220 **Mutants of *heuR* are unable to use heme as a source of iron.** To determine  
221 whether decreased expression of the Chu system affected the ability of the *heuR*  
222 mutant to use heme as an iron source, cultures of each strain were grown in iron-  
223 chelated conditions and supplemented with heme, hemoglobin, or ferric chloride.  
224 Both the *heuR* and *chuA* mutants were hypersensitive to iron-limiting conditions  
225 when compared to wild-type *C. jejuni* (Supplemental Figure 1). At 160  $\mu$ M  
226 desferrioxamine (DFOM), the *heuR* mutant with empty vector and the *chuA*  
227 mutant with empty vector exhibited greatly reduced growth compared to their  
228 behavior in iron-replete medium (Figure 4A). Heme added to these cultures was  
229 unable to rescue growth of the *heuR* and *chuA* mutants. Complementation of the  
230 *heuR* mutant with cloned *heuR* restored the ability to use heme as an iron  
231 source. In contrast, cloned *heuR* introduced into the *chuA* mutant did not restore  
232 heme dependent growth. Similar results were also seen using whole hemoglobin  
233 (Figure 4B). That iron restriction is the explanation for these phenotypes was  
234 supported by the restoration of growth in all strains through the addition of ferric  
235 chloride (Figure 4C).

236

237 **Figure 4. The *heuR* mutant is deficient in using heme as an iron source.**

238 (A) Growth of strains in media containing 160  $\mu$ M desferrioxamine and 0.1  $\mu$ g/ml  
239 purified heme. Represented as percent growth of same strains in media without  
240 desferrioxamine. (B) Growth of strains in media containing 160  $\mu$ M  
241 desferrioxamine, but with 0.1  $\mu$ g/ml purified hemoglobin. Represented as  
242 percent growth of strains in media without desferrioxamine. (C) Control growth of  
243 strains in media containing 160  $\mu$ M desferrioxamine, but with 100  $\mu$ M ferric  
244 chloride. Also represented as percent growth of strains in media without  
245 desferrioxamine. Statistical analysis performed using Student's t-test; \*\*\* :  $p <$   
246 0.0001.

247

248 **Mutation of *heuR* results in decreased cell-associated iron.** The *heuR*  
249 mutant expressed lower abundance of mRNA from several iron uptake systems  
250 (Table 1), suggesting it may play a general role in regulating iron acquisition. To  
251 test this, we examined cell-associated iron levels using inductively coupled  
252 plasma mass spectrometry (ICP-MS) of wild-type *C. jejuni*, *heuR* mutant, and  
253 *chuA* mutant lysates. This analysis demonstrated that iron levels of the *heuR*  
254 and *chuA* mutants significantly decreased compared to those of wild-type *C.*  
255 *jejuni* (Figure 5A).

256 Iron levels in samples of the *heuR* mutant complemented with cloned  
257 *heuR* were similar to those of wild-type *C. jejuni* (Figure 5B) ( $p = 0.28$ ). Similar to  
258 the results of the mutation alone, iron levels in the *chuA* mutant with pECO102  
259 were significantly decreased compared to wild-type *C. jejuni*. Consistent with our

260 hypothesis that HeuR regulates iron acquisition through *chu* expression, when  
261 *heuR* was expressed in the *chuA* mutant, cell-associated iron remained  
262 significantly decreased compared to wild-type *C. jejuni* (Figure 5B).

263

264 **Figure 5. ICP-MS analysis of *C. jejuni* cell-associated iron.** (A) Levels of  
265 cell-associated iron in wild-type *C. jejuni*, the *heuR* mutant, and the *chuA* mutant.  
266 Parts-per-billion iron levels for each strain were expressed as a percentage of the  
267 average iron levels observed in wild-type *C. jejuni*. (B) Complementation  
268 analysis of iron levels in strains carrying the empty vector control (pECO102) or  
269 the complementation construct (pECO*heuR*). Parts-per-billion iron levels for  
270 each strain were expressed as a percentage of the average iron levels observed  
271 in wild-type *C. jejuni* with empty vector. Statistical analyses performed using  
272 Student's t-test.

273

274 **The *heuR* mutant exhibited increased resistance to hydrogen peroxide.** We  
275 observed a lack of alpha-hemolysis on blood plates on which the *heuR* mutant  
276 was grown (data not shown). As alpha hemolysis is due to the formation of  
277 methemoglobin in the presence of hydrogen peroxide, we hypothesized that the  
278 *heuR* mutant may degrade hydrogen peroxide more readily than wild-type *C.*  
279 *jejuni*. This was tested directly by incubating the *heuR* mutant in the presence of  
280 hydrogen peroxide, which revealed that the mutant is resistant. Growth of wild-  
281 type *C. jejuni* was generally limited by hydrogen peroxide at concentrations  
282 above 0.15 mM and exhibited an IC<sub>50</sub> value of 0.233 mM (Figure 6A). In

283 contrast, the *heuR* mutant was unaffected by hydrogen peroxide with significantly  
284 increased growth compared to wild-type *C. jejuni* at concentrations above 0.15  
285 mM. As a result, the IC50 value was not experimentally determined and by  
286 extrapolation was found to be 5.8 mM. The *chuA* mutant exhibited an  
287 intermediate phenotype in the presence of hydrogen peroxide where growth  
288 remained relatively unaffected until concentrations reached 0.60 mM, which was  
289 significantly more growth than that of wild-type *C. jejuni*. As such, the *chuA*  
290 mutant exhibited an IC50 of 0.526 mM, a more than two-fold increase compared  
291 to wild-type *C. jejuni*, but approximately 10-fold lower than the *heuR* mutant.

292       Complementation of the *heuR* mutant with cloned *heuR* resulted in a slight  
293 hypersensitivity compared to wild-type *C. jejuni* with an IC50 value of 0.203 mM  
294 (Figure 6B).

295

296 **Figure 6. Dose-response analysis of *C. jejuni* mutants grown in presence**  
297 **of hydrogen peroxide.** (A) Growth of wild-type *C. jejuni*, the *heuR* mutant, and  
298 the *chuA* mutant in response to increasing concentrations of hydrogen peroxide.  
299 (B) Complementation analysis of hydrogen peroxide resistance conferred by the  
300 *heuR* mutation. Wild-type with empty vector, the *heuR* mutant with empty vector,  
301 or the *heuR* mutant with cloned *heuR* were grown in the presence of increasing  
302 hydrogen peroxide concentrations. All growth is expressed as a percentage of  
303 that observed for each strain in media alone. Statistical analysis performed using  
304 a Student's t test; \* :  $p < 0.01$ .

305

306 **Resistance of the *heuR* mutant to hydrogen peroxide is correlated with**  
307 **increased catalase activity.** We hypothesized that the elevated resistance of  
308 the *heuR* mutant to hydrogen peroxide may result from increased catalase  
309 activity. To determine whether this was the case, suspensions of strains were  
310 normalized and added to 30% H<sub>2</sub>O<sub>2</sub>, revealing that wild-type *C. jejuni* carrying  
311 empty vector was normally weakly positive (Table 3). In contrast, the *heuR*  
312 mutant transformed with empty vector was strongly positive for catalase activity.  
313 When *heuR* was re-introduced into the *heuR* background, catalase activity  
314 decreased and cells resembled wild-type activity. Also, similar to wild-type *C.*  
315 *jejuni*, the *chuA* mutant remained weakly positive, though the *chuA* mutant did  
316 appear to exhibit more catalase activity than wild-type *C. jejuni*.

317

318 **Table 3. Catalase activity of *C. jejuni* strains.**

| Strain (plasmid)                     | Catalase activity |
|--------------------------------------|-------------------|
| Wild-type <i>C. jejuni</i>           | +/-               |
| <i>heuR</i>                          | ++++              |
| <i>chuA</i>                          | +                 |
| Wild-type <i>C. jejuni</i> (pECO102) | +/-               |
| <i>heuR</i> (pECO102)                | ++++              |
| <i>heuR</i> (pECO <i>heuR</i> )      | +/-               |

319

## 320 **Discussion**

321 Using a TnSeq approach, we identified several determinants required by  
322 *C. jejuni* for efficient colonization of the chicken gastrointestinal tract (4). One  
323 determinant was a component of the *Campylobacter* heme utilization gene  
324 cluster, *chuB*. In this work, we describe a regulator, which we have named  
325 HeuR, which is also required for wild-type levels of colonization of the chicken



326 gastrointestinal tract. Additionally, because HeuR is predicted to contain a PAS  
327 domain - a protein signature often associated with gas molecule and redox  
328 potential sensing – and that it and *chu* are both required for chicken colonization,  
329 we hypothesized that HeuR regulates heme uptake through *chu* gene  
330 expression.

331         Recently, HeuR was also found to control expression of Cjj81176\_1390,  
332 as the gene product was overexpressed in a *heuR* mutant (13). The group that  
333 identified this phenotype named HeuR the *Campylobacter* flagella interaction  
334 regulator (CfiR) due to flagellar interactions that occurred in response to gene  
335 disruption. This group further found that the gene product of Cjj81176\_1390  
336 forms dimers linked by a disulfide bridge that may be responsive to the redox  
337 status of the cell (13). Our observations, recounted below, show that HeuR  
338 controls more genes than just those that promote flagellar interactions, including  
339 many that may be involved in combating oxidative stress (Figure 7). As such, we  
340 suggest that the designation CfiR does not accurately represent the full  
341 regulatory role in the bacterium and it is our recommendation that the name be  
342 changed to HeuR.

343

344 **Figure 7. Model of HeuR regulation of the chuABCDZ loci and heme**  
345 **homeostasis in *C. jejuni*.** Within the vertebrate host, heme is liberated from  
346 hemoglobin in an undefined manner. HeuR binds the intergenic region between  
347 *chuZ* and *chuABCD* to promote expression of heme acquisition functions. *ChuA*  
348 is the outermembrane heme receptor. *ChuBCD* transport heme to the cytoplasm

349 of the cell where iron is liberated from by the heme oxygenase ChuZ. The *heuR*  
350 mutant exhibits decreased expression of the chuABCDZ loci, decreased ability to  
351 use heme and hemoglobin as a source of nutrient iron, and decreased cell-  
352 associated iron levels as a consequence. Additionally, the *heuR* mutant exhibits  
353 decreased alpha hemolysis and increased catalase production.

354

355 As mentioned above, by RNAseq analysis of a *heuR* mutant strain, we  
356 identified several genes whose mRNA products were significantly less abundant  
357 in this background. Several of these were found to be involved in inorganic ion  
358 transport and metabolism, including all the genes in the previously identified  
359 *Campylobacter* heme utilization (*chu*) gene cluster. Transcript levels of several  
360 genes involved in enterochelin transport were decreased in the mutant strain, but  
361 were not identified by COG analysis as being involved in ion transport. As a  
362 result, this COG analysis is not comprehensive as the number of genes in the  
363 HeuR regulon that are involved in iron transport and metabolism is likely  
364 underreported. Nevertheless, based on these results, it becomes apparent that  
365 HeuR is primarily involved in maintaining sufficient levels of intracellular iron by  
366 upregulating systems that can scavenge for iron from diverse sources, which is  
367 supported by our ICP-MS data.

368 In addition to those genes that were underexpressed, transcripts of  
369 several were more abundant in the *heuR* mutant. Most of these genes are in two  
370 gene clusters: Cjj81176\_1390-1394 and Cjj81176\_1214-1217. The former,  
371 Cjj81176\_1390-1394, includes the overexpressed gene product (Cjj81176\_1390)

372 noted above that promotes flagellar interactions, supporting both the previous  
373 study and our work (13). The latter gene cluster that is upregulated includes one  
374 gene that encodes an additional ion transporter and multiple genes predicted to  
375 be involved in methionine biosynthesis. The methionine biosynthetic enzymes  
376 encoded by these genes have been shown in other organisms to be sensitive to  
377 oxidation/oxidative stress (14). In an oxidative environment, these enzymes may  
378 need to be replenished, and their inverse expression with that of iron scavenging  
379 systems may be common. Whether upregulation of these genes is a direct or  
380 indirect effect of HeuR is currently unknown.

381         Standard growth assays using the iron chelator, desferrioxamine, found  
382 that both the *heuR* and *chuA* mutants are reduced for growth in iron-chelated  
383 conditions. As this was observed in media without the addition of hemoglobin, it  
384 may indicate that the Chu system is also partially responsible for the transport of  
385 free iron into the cell. In this case, it would likely be an accessory system since  
386 growth was completely restored in these mutants when iron was supplemented  
387 back, indicating the presence of a robust, primary iron transport system. When  
388 heme and hemoglobin were added to these mutants, growth was not restored,  
389 supporting the conclusion that both are required for using heme as an iron  
390 source. Re-introduction of *heuR* resulted in the ability to use heme as an iron  
391 source, likely through the Chu system, as overexpressing *heuR* in the *chuA*  
392 mutant did not enable the strain to use hemoglobin.

393         Analysis of cell-associated levels of iron showed that the *heuR* mutant is  
394 significantly decreased for iron and that these levels resemble those of a *chuA*

395 mutant. Most of the iron reduction observed in these experiments is likely due to  
396 decreased heme utilization, as cultures were obtained from media containing  
397 sheep's blood. This is further supported by the observation that  
398 complementation with *heuR* restores iron levels in a *heuR* mutant background,  
399 but was unable to do so in a *chuA* mutant background. As our data indicates a  
400 minor role for HeuR and the Chu system in acquiring iron independently of heme,  
401 we are currently determining whether decreased iron is apparent in the *heuR* and  
402 *chuA* mutants grown in media without heme or hemoglobin. This will help us  
403 determine to what extent other iron sources are impacting cellular iron levels in  
404 these mutants.

405         When the *heuR* mutant was grown on blood plates, differences in the  
406 hemolytic pattern relative to wild-type *C. jejuni* became apparent. Typically, *C.*  
407 *jejuni* exhibits alpha hemolysis on blood plates, likely due to the production of  
408 hydrogen peroxide that oxidizes the hemoglobin in the blood to methemoglobin  
409 (15). Alpha hemolysis was not observed in the *heuR* mutant, indicating that this  
410 mutant either produces less hydrogen peroxide or exhibits increased catalase  
411 activity. The mutant was highly resistant to hydrogen peroxide, which was  
412 associated with elevated levels of catalase activity; re-introduction of *heuR* led to  
413 both decreased resistance to hydrogen peroxide and catalase activity. Of the  
414 genes known to regulate catalase activity in *C. jejuni* - including *ahpC*, *fur*, *kataA*  
415 and *perR* - none were found to be significantly up- or down-regulated in the *heuR*  
416 mutant (data not shown). Also, since iron levels are similar in the *chuA* mutant, it  
417 is unlikely that iron levels are responsible for the elevated catalase activity. Thus

418 we hypothesize that HeuR regulates the production of an unknown factor that  
419 perhaps post-transcriptionally regulates the activity of *C. jejuni* catalase. We are  
420 currently working to determine what this factor is.

421 The *heuR* mutant exhibited significant decreases in colonization of the  
422 chicken cecum. This leads to two questions: i) is this system mainly required for  
423 combating oxidative stress in the cecum or is it used for other cellular processes  
424 and ii) is the system acquiring iron from a heme source or does it serve the dual  
425 purpose of acquiring free iron from the environment.

426 Oxidative stress in the cecum may come from a variety of sources, like  
427 metabolism by the intestinal microbiota or from the generation of reactive oxygen  
428 species due to intestinal inflammation. While the *Campylobacter*-chicken  
429 relationship is often considered to be commensal in nature, *C. jejuni* colonization  
430 of the chicken gastrointestinal tract may result in low levels of transient  
431 inflammation (Davis and DiRita, unpublished) (16-18). Also, while not mutually  
432 exclusive, iron acquisition systems like Chu may be more important for acquiring  
433 iron that can be used in other cellular processes including energy generation and  
434 DNA replication (6). We are currently working to determine which of the  
435 processes during chicken colonization iron is most important for.

436 Second, the question arises as to whether *C. jejuni* uses the Chu system  
437 to acquire iron from either/or a heme or non-heme source. It is currently  
438 unknown how much heme chickens consume in a commercial diet and we could  
439 find no data on heme availability in their natural diet. With the exception of  
440 higher plants that can produce heme in the plastids, the absence of heme

441 molecules in most grains, plants, and insects make it less obvious how chickens  
442 would have access to heme-containing molecules (19). The likelihood then  
443 becomes that *C. jejuni* uses this system to either scavenges heme from a  
444 microbial source or from the host. The *C. jejuni* 81-176 genome encodes all  
445 heme biosynthetic enzymes with the exception of homologs for  
446 protoporphyrinogen oxidase (*hemY* or *hemG*). As such, in an iron rich  
447 environment, *C. jejuni* can likely synthesize its own heme. It could then use the  
448 heme uptake system to recover heme from other *Campylobacter* or from heme  
449 producing residents of the chicken microbiota. Lastly, it remains possible that  
450 this system is able to transport free iron. While the heme receptor and heme  
451 oxygenase (*ChuA* and *ChuZ*, respectively) would likely not be needed for free  
452 iron transport, the accompanying ABC transport system (*ChuBCD*) may be  
453 promiscuous and function similar to other iron transporters. We are currently  
454 investigating whether the *ChuBCD* transporter can translocate non-heme iron  
455 into *C. jejuni*.

456

## 457 **Materials and Methods**

458

459 **Day-of-hatch chick colonization.** Day-of-hatch white leghorn chickens were  
460 inoculated by oral gavage with 100  $\mu$ l of an approximately  $1 \times 10^9$  cfu/ml bacterial  
461 suspension in sterile PBS ( $10^8$  cfu). Colonized chickens were housed for 7 days,  
462 euthanized, and cecal contents were collected. Cecal contents were  
463 homogenized in sterile PBS and serial dilutions were plated on *Campylobacter*

464 selective media: MH agar containing 10% sheep's blood, cefoperazone (40  
465 µg/ml), cycloheximide (100 µg/ml), trimethoprim (10 µg/ml), and vancomycin (100  
466 µg/ml). Plates were grown for 48h under microaerobic conditions and colonies  
467 enumerated. Statistical analysis of the medians was performed using a Mann-  
468 Whitney test.

469 For the competition experiment, equal numbers of wild-type *C. jejuni* and  
470 the *heuR* mutant were mixed and approximately  $1 \times 10^8$  of each were used to  
471 inoculate day-of-hatch chicks by oral gavage. Harvest of cecal contents was  
472 done the same as above except serial dilutions were plated on *Campylobacter*  
473 selective media with and without kanamycin (100 µg/ml). Competitive index  
474 values were calculated following correction for inoculum amounts by dividing the  
475 number of *heuR* mutants by the number of wild-type bacteria. Statistical analysis  
476 was done using a one-sample t-test against a hypothetical value of 1.

477 All chicken experiments and protocols were approved by the Institutional  
478 Animal Care and Use Committee in the Animal Care Program at Michigan State  
479 University.

480

481 **RNAseq analysis.** Triplicate cultures of wild-type DRH212 and the *heuR* mutant  
482 were grown on MH agar supplemented with 10% whole sheep's blood and 10  
483 µg/ml trimethoprim overnight at 37°C under microaerobic conditions. Cells were  
484 harvested and grown on new media for a second night using the same  
485 conditions. Following growth, cells were harvested from each individual plate  
486 and RNA was extracted using a previously described protocol (20). DNA was

487 degraded using Turbo DNA-free (Thermo) according to the manufacturer's  
488 instructions and removal was confirmed by conventional PCR. RNA quality was  
489 assessed using an Agilent 2100 Bioanalyzer and libraries were generated using  
490 the TruSeq RNA Library Preparation Kit (Illumina). Libraries were sequenced  
491 using an Illumina HiSeq 2000 formulated for single-end, 50-nucleotide reads.

492 Analysis of sequence data was performed using SPARTA: Simple  
493 Program for Automated reference-based bacterial RNAseq Transcriptome  
494 Analysis (21). Briefly, raw reads were trimmed and assessed for quality using  
495 Trimmomatic and FastQC, respectively (22). Trimmed reads were mapped to  
496 the *C. jejuni* 81-176 reference genome using Bowtie and expression levels  
497 determined by HTSeq (23, 24). Lastly, differential expression analysis was  
498 performed using edgeR (25). Cluster of orthologous group (COG) identification  
499 of selected genes was performed using Microbial Genomic context Viewer  
500 (MGcV).

501

502 **Protein purification.** The gene *heuR* was amplified by PCR from *C. jejuni* 81-  
503 176 genomic DNA using primers 5'Cjj1389 *Bam*HI and 3'Cjj1389 *Sal*I. The PCR  
504 fragment was subcloned into pGEM-T Easy using the manufacturer's protocol  
505 and sequenced using primers T7 and SP6. Fragments that were confirmed to  
506 have maintained the full nucleotide sequence of *heuR* were excised using *Bam*HI  
507 and *Sal*I and ligated into the expression vector, pQE-30 (Qiagen). Ligation  
508 products were transformed into *E. coli* NEB C3013 and insertion was confirmed  
509 using restriction digest of purified plasmids.



510 Induction of 6xHis-HeuR using 1 mM IPTG was confirmed for six  
511 constructs by SDS-PAGE and Coomassie staining. One strain was used for  
512 protein purification where a 1L culture was grown to mid-log and induced for 3h  
513 at 37°C using 1mM IPTG. Cells were pelleted at 8,000 rpm for 20 min at 4°C  
514 and re-suspended in 20 ml lysis buffer (pH 8.0) (50 mM NaH<sub>2</sub>PO<sub>4</sub>, 300 mM NaCl,  
515 10 mM imidazole). The cell suspension was passed three times through a french  
516 press and cell debris was removed by centrifugation at 8,000 rpm for 20 min at  
517 4°C. The cleared lysate was added to 5 ml of NiNTA agarose that was pre-  
518 equilibrated with lysis buffer and rocked overnight at 4°C. This resin-protein  
519 mixture was packed by gravity into a chromatography column and lysate was  
520 passed through and collected. Non-specific proteins were removed by washing  
521 the resin bed twice with 5 column volumes (25 ml) of wash buffer (pH 8.0) (50  
522 mM NaH<sub>2</sub>PO<sub>4</sub>, 300 mM NaCl, 20 mM imidazole). Bound protein was eluted four  
523 times using 1 ml of elution buffer (pH 8.0) (50 mM NaH<sub>2</sub>PO<sub>4</sub>, 300 mM NaCl, 250  
524 mM imidazole). Successful purification of 6xHis-HeuR was verified by SDS-  
525 PAGE and Coomassie staining. Fractions containing the highest amount of  
526 HeuR were pooled and dialyzed against storage buffer (50 mM Tris (pH 7.5), 150  
527 mM NaCl, 0.5 mM EDTA, 0.02% Triton X-100, 2 mM DTT, 50% glycerol).  
528 Concentrations of 6xHis-HeuR were determined using a BCA Protein Assay  
529 (Pierce) and aliquots of protein were stored at -80°C.

530

531 **Electrophoretic mobility shift assays.** A specific DNA probe was generated  
532 from the *chuZA* promoter region and a non-specific probe was generated from

533 the *mapA-ctsW* intergenic region by PCR of *C. jejuni* 81-176 genomic DNA.  
534 Amplicons were purified using a PCR Purification Kit (Qiagen) and subsequently  
535 end-labeled with [ $\gamma$ -<sup>32</sup>P] ATP using T4 polynucleotide kinase (PNK) (New  
536 England Biolabs). DNA binding reactions containing radiolabeled specific  
537 (*chuZA* promoter) and non-specific probes (*mapA-ctsW* intergenic) at  
538 approximately 0.25 nM, DNA binding buffer (10 mM Tris, pH 7.5, 50 mM KCl, 1  
539 mM EDTA, 1 mM DTT, 5% glycerol), 25 ng/ $\mu$ l poly(dA-dT), and 100  $\mu$ g/ml BSA  
540 were incubated for 5 min at room temperature. Purified 6xHis-HeuR was diluted  
541 two-fold in binding buffer and 1  $\mu$ l containing 500, 250, 125, 60, 30, 15, 7.5, or  
542 3.75  $\mu$ g of protein was added to individual 19  $\mu$ l binding reactions (20  $\mu$ l total).  
543 These reactions – and a control reaction without 6xHis-HeuR – were incubated  
544 for 15 min at room temperature and subsequently resolved on a 5%  
545 polyacrylamide native Tris-glycine gel at 4°C. Gels were imaged using a  
546 Typhoon phosphoimager.

547

548 **Hemoglobin and heme growth assays.** For bacterial growth assays, *C. jejuni*  
549 strains were grown overnight on tryptic soy agar plates supplemented with 5%  
550 sheep blood and appropriate antibiotics (chloramphenicol and/or kanamycin).  
551 The following day, plate cultures were utilized to inoculate 5 mL of Mueller-Hinton  
552 broth supplemented with appropriate antibiotics. These liquid cultures were  
553 incubated under shaking conditions at 37°C overnight. The following day,  
554 cultures were diluted 1:10 in fresh Mueller-Hinton broth (26) supplemented with  
555 appropriate antibiotics (chloramphenicol and/or kanamycin) alone (Medium

556 Alone) or supplemented with 40, 80, 160  $\mu\text{M}$  of the iron chelator desferrioxamine  
557 mesylate (Sigma Aldrich) alone or in combination with 0.1  $\mu\text{g}/\text{mL}$  of purified  
558 human hemoglobin (1) or 0.1  $\mu\text{g}/\text{mL}$  of hemin at 37°C in room air supplemented  
559 with 5%  $\text{CO}_2$ . Bacterial growth was measured using a spectrophotometric  
560 reading at 600 nm ( $\text{OD}_{600}$ ). Statistical analysis was performed using a Student's  
561 t-test.

562

563 **ICP-MS analysis.** Cultures of wild-type *C. jejuni* DRH212, the *heuR* mutant, and  
564 a *chuA* mutant, were grown overnight at 37°C under microaerobic conditions on  
565 MH agar with 10% whole sheep's blood containing either 10  $\mu\text{g}/\text{ml}$  trimethoprim  
566 or 100  $\mu\text{g}/\text{ml}$  kanamycin – for mutant strains. For complementation analysis,  
567 wild-type with pECO102, the *heuR* mutant with pECO102, the *heuR* mutant with  
568 pECO*heuR*, the *chuA* mutant with pECO102, and the *chuA* mutant with  
569 pECO*heuR* were grown on MH agar with 10% sheep's blood containing either  
570 chloramphenicol (30  $\mu\text{g}/\text{ml}$ ) alone – for wild-type – or chloramphenicol and  
571 kanamycin (100  $\mu\text{g}/\text{ml}$ ) - for the plasmid-containing mutants. Cultures were  
572 grown overnight under microaerobic conditions at 37°C. Strains were passed for  
573 a second night on fresh media and harvested for iron quantification.  
574 Approximately  $10^{10}$  cells were washed three times with 5 ml and re-suspended in  
575 500  $\mu\text{l}$  of molecular-grade, distilled water. Cells were solubilized overnight at  
576 50°C in 1ml 50% nitric acid, followed by the addition of 9 ml of water.

577 Extracts were analyzed for  $^{57}\text{Fe}$  using A Thermo Scientific ICAP Q  
578 quadrupole inductively coupled plasma mass spectrometer in kinetic energy

579 dispersion mode. Instrument calibration was done with aliquots of a Fe synthetic  
580 standard solution diluted at 2.5, 10, and 100 ppb and natural water standards  
581 NIST SRM 1640 and 1643e. A solution of 100 ppb Fe was analyzed every 5 - 6  
582 samples to monitor instrumental drift; all samples were corrected for linear drift.  
583 Oxides formation rate was determined to be < 2% by measuring CeO/Ce and  
584 double-charged cation formation rate was found to be < 3% by measuring  
585  $^{137}\text{Ba}^{++}/^{137}\text{Ba}$  from a solution with approximately 1 ppb Ce and 1 ppb Ba.

586         Parts-per-billion levels for each strain were normalized to those observed  
587 for the wild-type equivalent in each experiment and the standard deviation was  
588 plotted. Statistical analysis was performed using a Student's t-test.

589

590 **Hydrogen peroxide dose-response assays.** Cultures of wild-type *C. jejuni*, the  
591 *heuR* mutant, and the *chuA* mutant were grown overnight at 37°C under  
592 microaerobic conditions on MH agar with 10% sheep's blood. Typically, *C. jejuni*  
593 exhibits alpha hemolysis on blood plates, likely due to the production of hydrogen  
594 peroxide that oxidizes the hemoglobin in the blood to methemoglobin. Strains  
595 were passed for a second night on new media under the same conditions. Cells  
596 were harvested into MH broth and normalized to an OD  $A_{600}$  of 0.05. These  
597 suspensions were added to equal volumes (100  $\mu\text{l}$ :100  $\mu\text{l}$ ) of 2-fold dilutions of  
598 MH broth with hydrogen peroxide in a 96-well plate. Hydrogen peroxide  
599 concentrations ranged from 10 mM to 0.16 mM. This dilution resulted in bacterial  
600 concentrations of 0.025 OD and hydrogen peroxide concentrations ranging from  
601 5 mM to 0.08 mM. These cultures were grown statically for 48h at 37°C under

602 microaerobic conditions followed by re-suspension of bacteria and recording of  
603 terminal OD A<sub>600</sub> values. IC50 values were calculated using non-linear  
604 regression analysis of normalized responses with variable slopes in GraphPad  
605 Prism 6. Statistical analysis of differences between strains at each concentration  
606 of hydrogen peroxide was performed using a Student's t-test.

607 For complementation analysis of the *heuR* phenotype, the complemented  
608 strains used for ICP-MS analysis were subjected to the same hydrogen peroxide  
609 dose-response assay as those strains above. Statistical analysis was also  
610 performed using a Student's t-test.

611

612 **Catalase assays.** Cultures of wild-type *C. jejuni*, the *heuR* mutant, and the  
613 *chuA* mutant were grown overnight at 37°C on MH agar with 10% sheep's blood  
614 under microaerobic conditions. These strains were passed for a second night on  
615 new media under the same conditions and cells were harvested into sterile PBS.  
616 Care was given to avoid contaminating the suspensions with media since blood  
617 exhibits catalase activity. Suspensions were normalized to an OD A<sub>600</sub> of 1.0 and  
618 10 µl of suspension was added to 10 µl of 30% hydrogen peroxide (J.T. Baker)  
619 on a glass slide. Reactions were performed in triplicate and qualitatively noted.

620

## 621 **Acknowledgements**

622

623 We would like to thank Ben K. Johnson at Michigan State University for his help  
624 with analyzing RNAseq results using SPARTA.

625

626 JGJ was supported by USDA NIFA grant 2013-67012-25269. Funding for JAG

627 was provided by Department of Veteran Affairs' Office of Medical Research

628 grant CDA-21K2BX001701. VJD was supported by start-up funds from

629 Michigan State University and by NIH NIAID grant R21AI111192.

630

- 631 1. Hampton T. Report reveals scope of US antibiotic resistance threat. *JAMA : the journal of the American Medical Association*. 2013 Oct 23;310(16):1661-3.  
632 PubMed PMID: 24150445.
- 634 2. Riddle MS, Guerry P. Status of vaccine research and development for  
635 *Campylobacter jejuni*. *Vaccine*. 2016 Mar 11. PubMed PMID: 26973064.
- 636 3. Keithlin J, Sargeant J, Thomas MK, Fazil A. Systematic review and meta-  
637 analysis of the proportion of *Campylobacter* cases that develop chronic sequelae.  
638 *BMC public health*. 2014;14:1203. PubMed PMID: 25416162. Pubmed Central  
639 PMCID: 4391665.
- 640 4. Johnson JG, Livny J, Dirita VJ. High-throughput sequencing of *Campylobacter*  
641 *jejuni* insertion mutant libraries reveals mapA as a fitness factor for chicken  
642 colonization. *Journal of bacteriology*. 2014 Jun;196(11):1958-67. PubMed PMID:  
643 24633877. Pubmed Central PMCID: 4010991.
- 644 5. Hendrixson DR, DiRita VJ. Identification of *Campylobacter jejuni* genes  
645 involved in commensal colonization of the chick gastrointestinal tract. *Molecular*  
646 *microbiology*. 2004 Apr;52(2):471-84. PubMed PMID: 15066034. Epub  
647 2004/04/07. eng.
- 648 6. Anzaldi LL, Skaar EP. Overcoming the heme paradox: heme toxicity and  
649 tolerance in bacterial pathogens. *Infection and immunity*. 2010 Dec;78(12):4977-89.  
650 PubMed PMID: 20679437. Pubmed Central PMCID: 2981329.
- 651 7. Ridley KA, Rock JD, Li Y, Ketley JM. Heme utilization in *Campylobacter jejuni*.  
652 *Journal of bacteriology*. 2006 Nov;188(22):7862-75. PubMed PMID: 16980451.  
653 Pubmed Central PMCID: 1636299.
- 654 8. Zhang R, Zhang J, Guo G, Mao X, Tong W, Zhang Y, et al. Crystal structure of  
655 *Campylobacter jejuni* ChuZ: a split-barrel family heme oxygenase with a novel  
656 heme-binding mode. *Biochemical and biophysical research communications*. 2011  
657 Nov 11;415(1):82-7. PubMed PMID: 22020097.
- 658 9. Kehrer JP. The Haber-Weiss reaction and mechanisms of toxicity. *Toxicology*.  
659 2000 Aug 14;149(1):43-50. PubMed PMID: 10963860.
- 660 10. Henry JT, Crosson S. Ligand-binding PAS domains in a genomic, cellular, and  
661 structural context. *Annual review of microbiology*. 2011;65:261-86. PubMed PMID:  
662 21663441. Pubmed Central PMCID: 3298442.
- 663 11. Miller CE, Williams PH, Ketley JM. Pumping iron: mechanisms for iron uptake  
664 by *Campylobacter*. *Microbiology*. 2009 Oct;155(Pt 10):3157-65. PubMed PMID:  
665 19696110.
- 666 12. Holden VI, Bachman MA. Diverging roles of bacterial siderophores during  
667 infection. *Metallomics : integrated biometal science*. 2015 Jun;7(6):986-95. PubMed  
668 PMID: 25745886.
- 669 13. Reuter M, Periago PM, Mulholland F, Brown HL, van Vliet AH. A PAS domain-  
670 containing regulator controls flagella-flagella interactions in *Campylobacter jejuni*.  
671 *Frontiers in microbiology*. 2015;6:770. PubMed PMID: 26284050. Pubmed Central  
672 PMCID: 4519771.
- 673 14. Hondorp ER, Matthews RG. Oxidative stress inactivates cobalamin-  
674 independent methionine synthase (MetE) in *Escherichia coli*. *PLoS biology*. 2004  
675 Nov;2(11):e336. PubMed PMID: 15502870. Pubmed Central PMCID: 521173.

- 676 15. Nagababu E, Chrest FJ, Rifkind JM. Hydrogen-peroxide-induced heme  
677 degradation in red blood cells: the protective roles of catalase and glutathione  
678 peroxidase. *Biochimica et biophysica acta*. 2003 Mar 17;1620(1-3):211-7. PubMed  
679 PMID: 12595091.
- 680 16. Smith CK, Kaiser P, Rothwell L, Humphrey T, Barrow PA, Jones MA.  
681 *Campylobacter jejuni*-induced cytokine responses in avian cells. *Infection and*  
682 *immunity*. 2005 Apr;73(4):2094-100. PubMed PMID: 15784550. Pubmed Central  
683 PMCID: 1087459.
- 684 17. Borrmann E, Berndt A, Hanel I, Kohler H. *Campylobacter*-induced  
685 interleukin-8 responses in human intestinal epithelial cells and primary intestinal  
686 chick cells. *Veterinary microbiology*. 2007 Sep 20;124(1-2):115-24. PubMed PMID:  
687 17540517.
- 688 18. Li YP, Ingmer H, Madsen M, Bang DD. Cytokine responses in primary chicken  
689 embryo intestinal cells infected with *Campylobacter jejuni* strains of human and  
690 chicken origin and the expression of bacterial virulence-associated genes. *BMC*  
691 *microbiology*. 2008;8:107. PubMed PMID: 18588667. Pubmed Central PMCID:  
692 2443369.
- 693 19. Espinas NA, Kobayashi K, Takahashi S, Mochizuki N, Masuda T. Evaluation of  
694 unbound free heme in plant cells by differential acetone extraction. *Plant & cell*  
695 *physiology*. 2012 Jul;53(7):1344-54. PubMed PMID: 22555813.
- 696 20. Taveirne ME, Theriot CM, Livny J, Dirita VJ. The Complete *Campylobacter*  
697 *jejuni* Transcriptome during Colonization of a Natural Host Determined by RNAseq.  
698 *PloS one*. 2013;8(8):e73586. PubMed PMID: 23991199. Pubmed Central PMCID:  
699 3749233. Epub 2013/08/31. eng.
- 700 21. Johnson BK, Scholz MB, Teal TK, Abramovitch RB. SPARTA: Simple Program  
701 for Automated reference-based bacterial RNA-seq Transcriptome Analysis. *BMC*  
702 *bioinformatics*. 2016;17:66. PubMed PMID: 26847232. Pubmed Central PMCID:  
703 4743240.
- 704 22. Bolger AM, Lohse M, Usadel B. Trimmomatic: a flexible trimmer for Illumina  
705 sequence data. *Bioinformatics*. 2014 Aug 1;30(15):2114-20. PubMed PMID:  
706 24695404. Pubmed Central PMCID: 4103590.
- 707 23. Langmead B, Trapnell C, Pop M, Salzberg SL. Ultrafast and memory-efficient  
708 alignment of short DNA sequences to the human genome. *Genome biology*.  
709 2009;10(3):R25. PubMed PMID: 19261174. Pubmed Central PMCID: 2690996.
- 710 24. Anders S, Pyl PT, Huber W. HTSeq--a Python framework to work with high-  
711 throughput sequencing data. *Bioinformatics*. 2015 Jan 15;31(2):166-9. PubMed  
712 PMID: 25260700. Pubmed Central PMCID: 4287950.
- 713 25. Robinson MD, McCarthy DJ, Smyth GK. edgeR: a Bioconductor package for  
714 differential expression analysis of digital gene expression data. *Bioinformatics*. 2010  
715 Jan 1;26(1):139-40. PubMed PMID: 19910308. Pubmed Central PMCID: 2796818.
- 716 26. Kehl-Fie TE, Chitayat S, Hood MI, Damo S, Restrepo N, Garcia C, et al. Nutrient  
717 metal sequestration by calprotectin inhibits bacterial superoxide defense, enhancing  
718 neutrophil killing of *Staphylococcus aureus*. *Cell host & microbe*. 2011 Aug  
719 18;10(2):158-64. PubMed PMID: 21843872. Pubmed Central PMCID: 3157011.  
720 Epub 2011/08/17. eng.
- 721



722

723 **S1. Dose-response analysis of desferrioxamine.** *C. jejuni* strains grown in  
724 the presence of increasing amounts of desferrioxamine (DFOM). Growth at each  
725 concentration of DFOM is expressed as percent growth of that strain in media  
726 alone.

727

728 **Figure 1.**

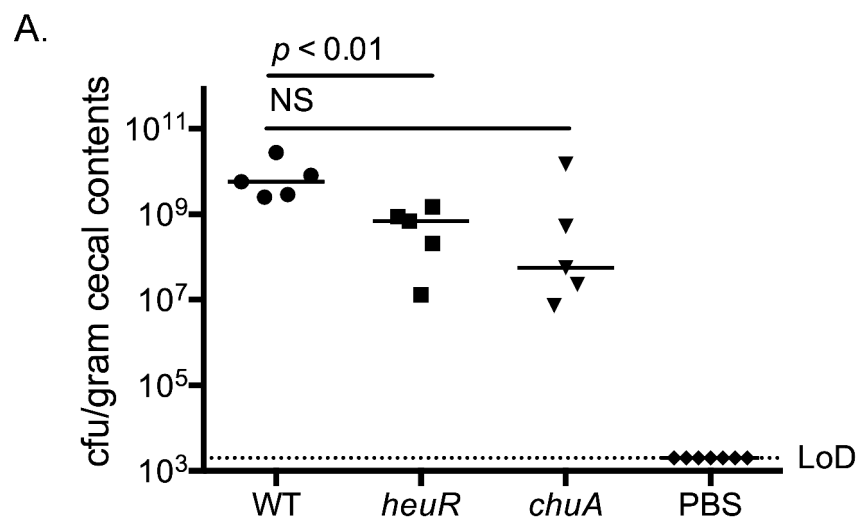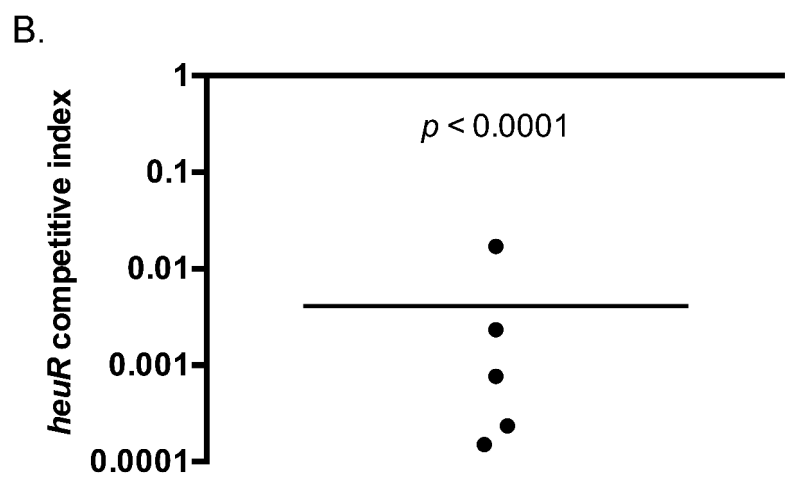

729

730

731 **Figure 2.**

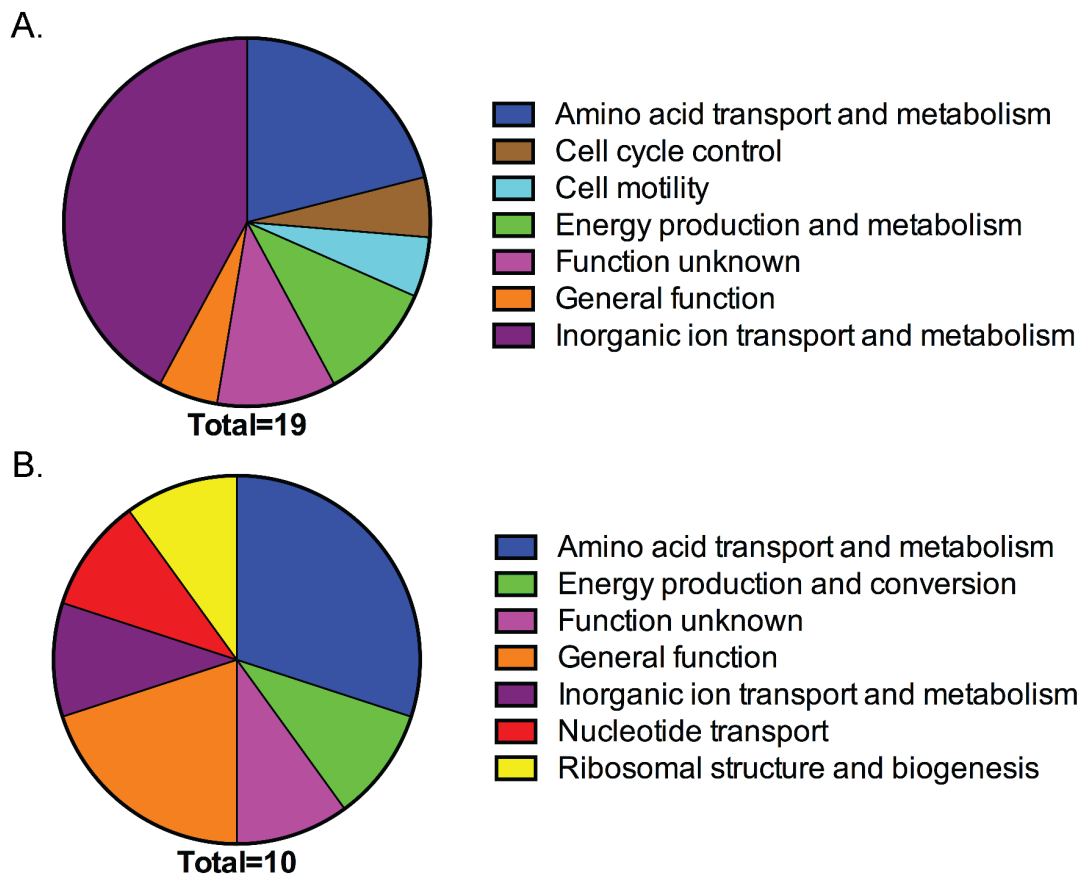

732

733

734 **Figure 3.**

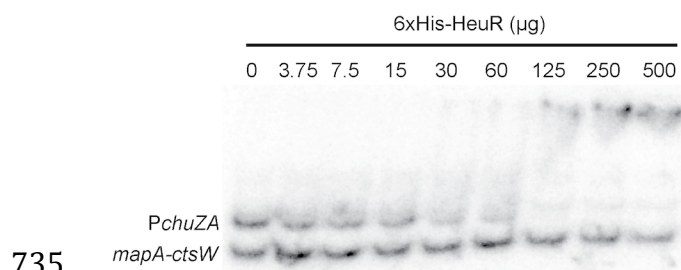

736

737 **Figure 4.**

A.

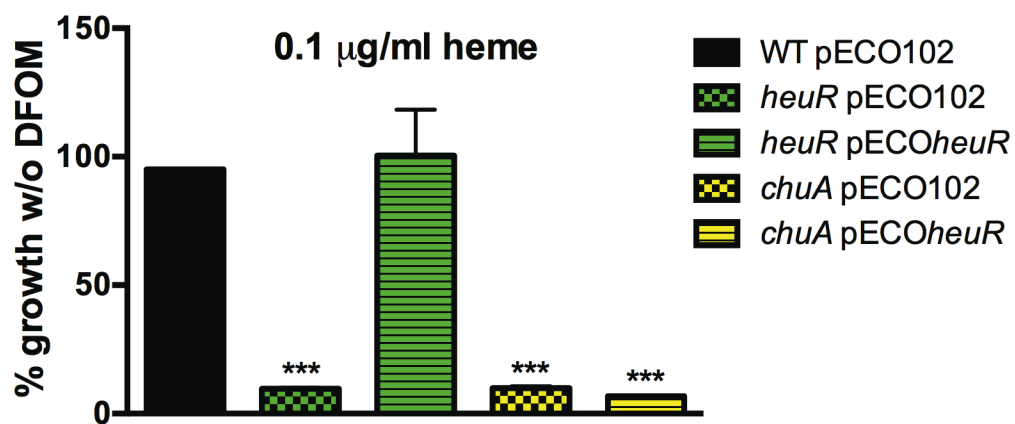

B.

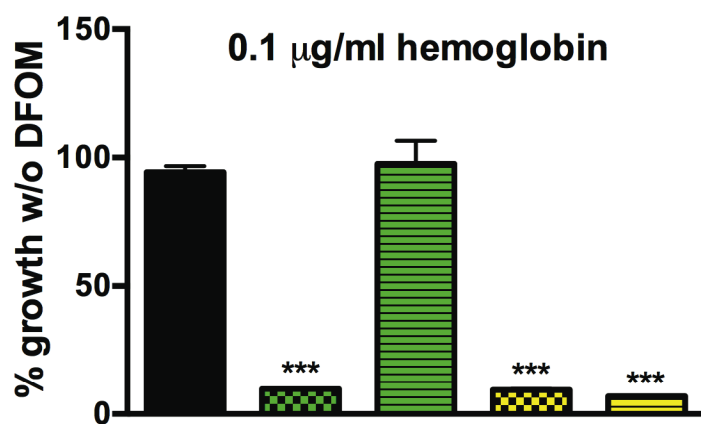

C.

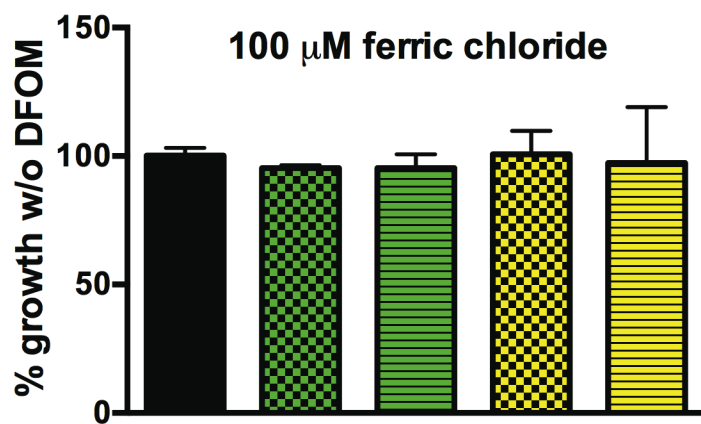

738

739

740 **Figure 5.**

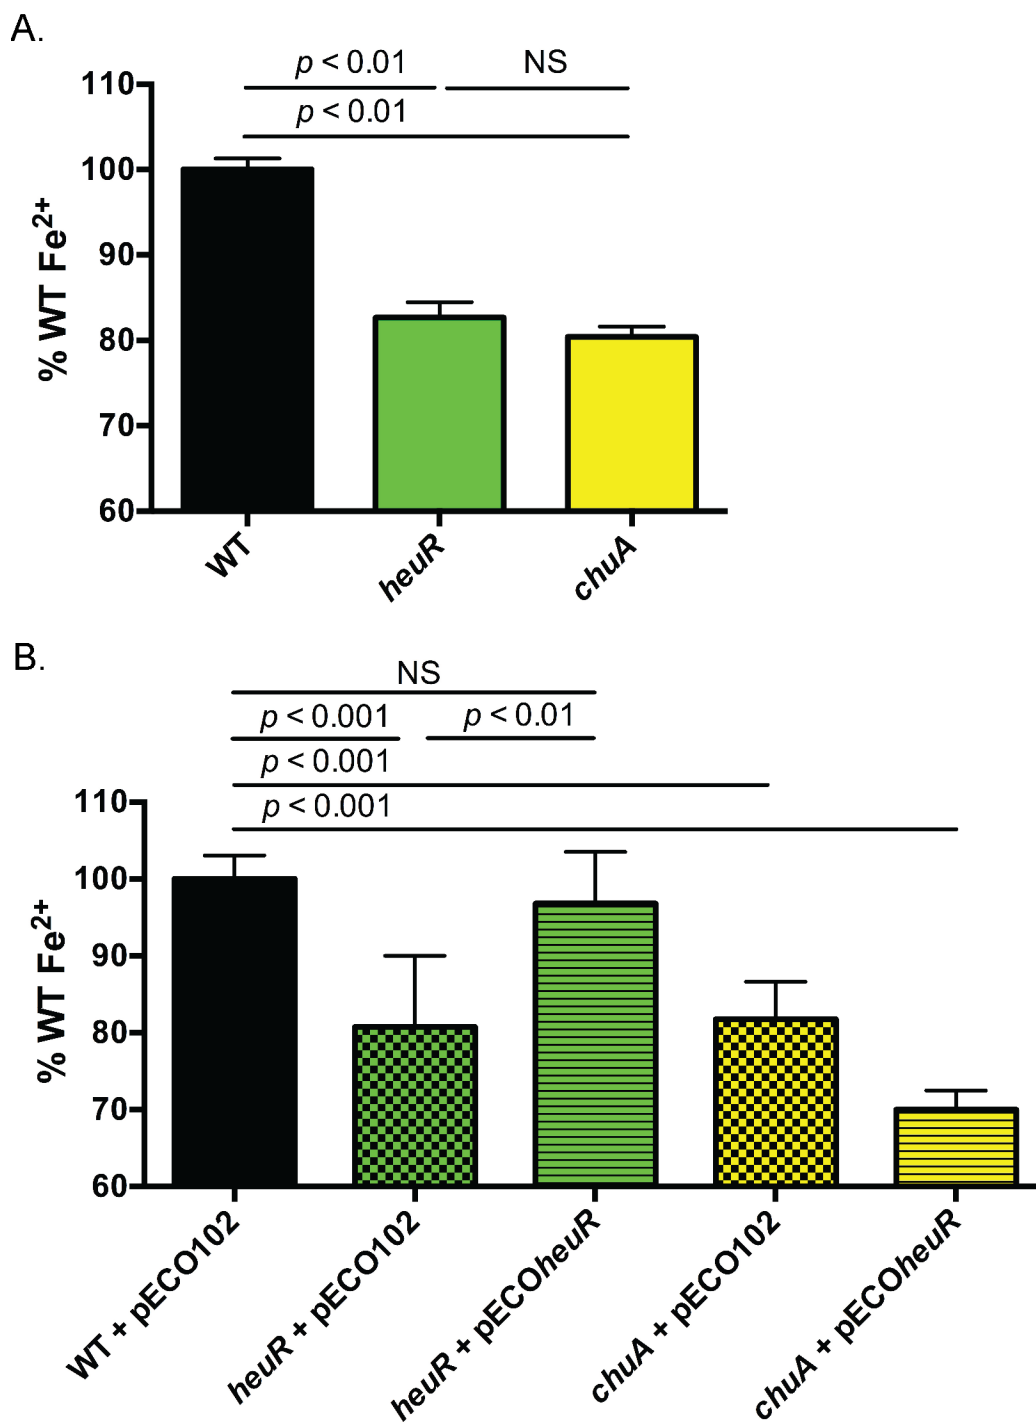

741

742

743 **Figure 6.**

A.

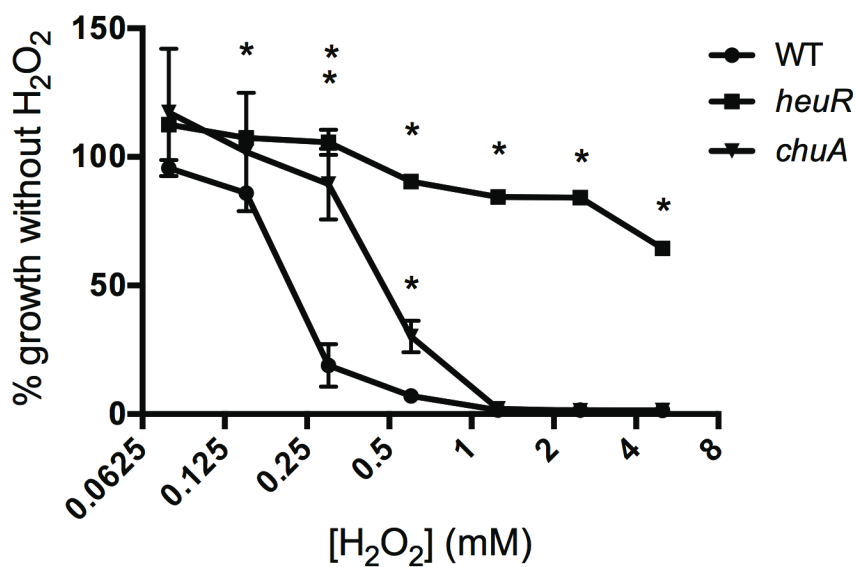

B.

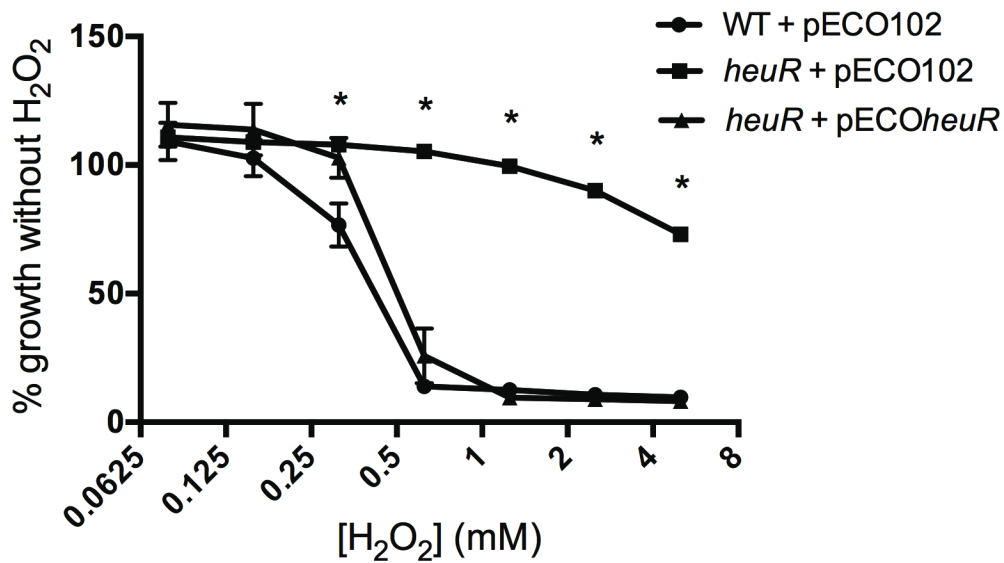

744

745

746 **Figure 6.**

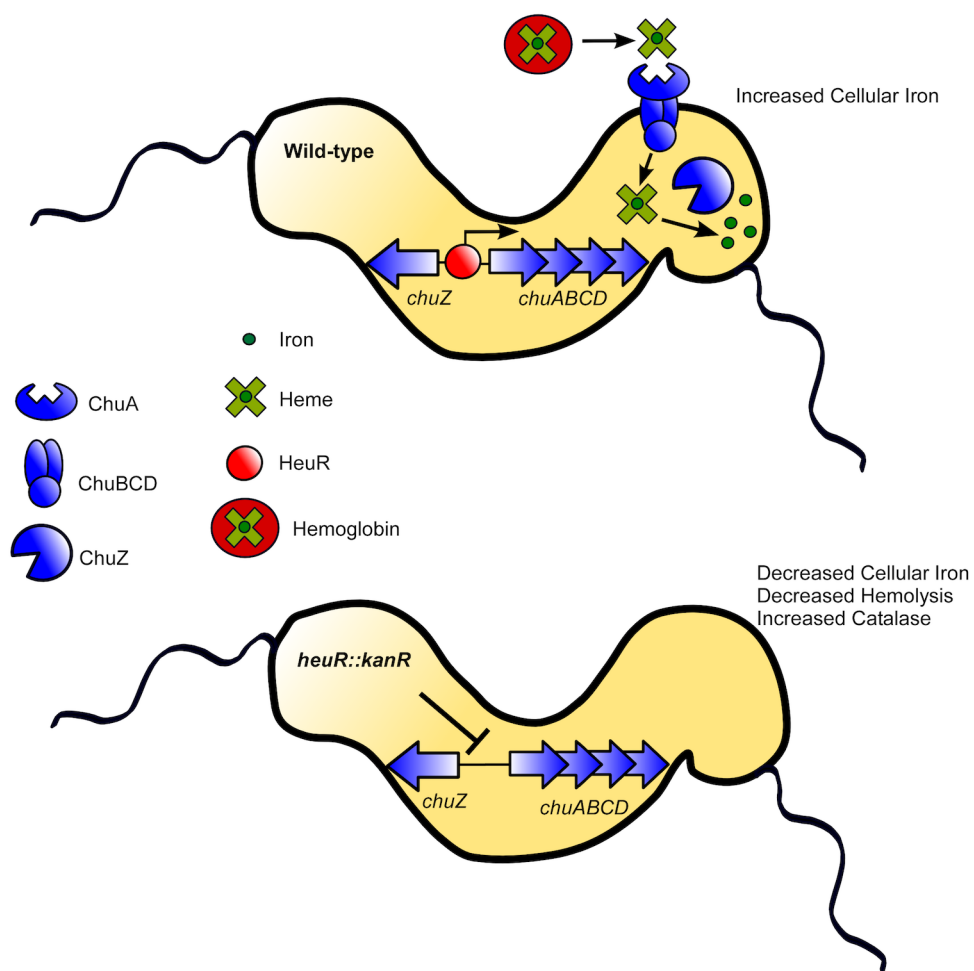

747

748



749 Supplemental Figure.

750

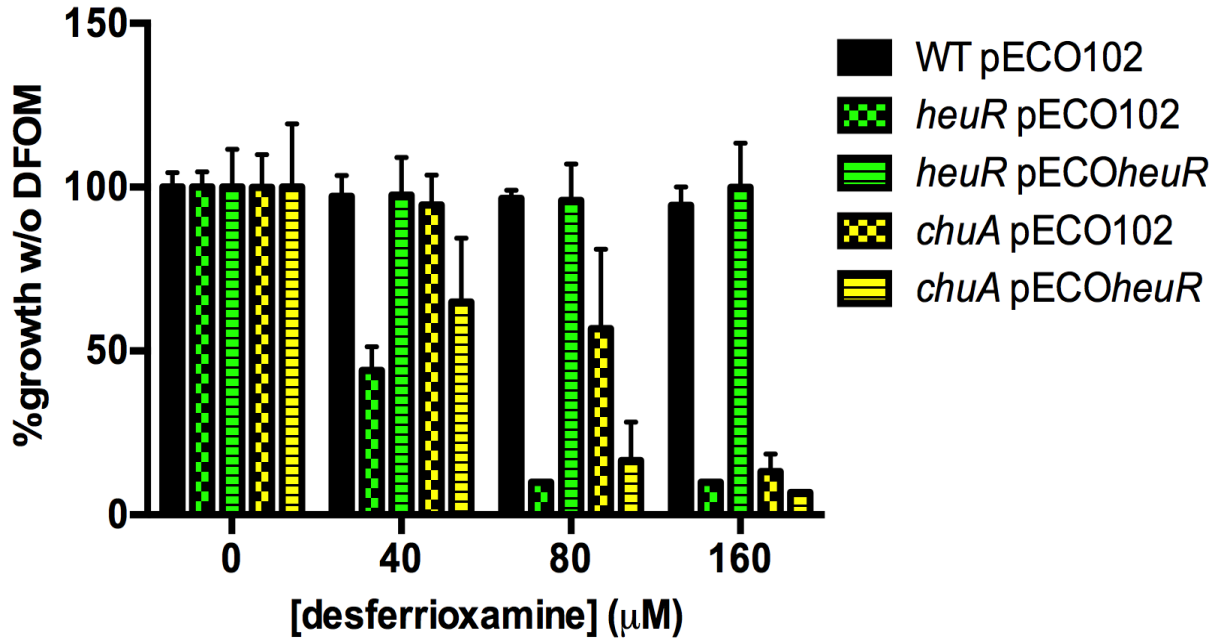

751

752

753

754

755
